# Supplementary material for: Systematic proteome and proteostasis profiling in human Trisomy 21 fibroblast cells
Source: PubMed Central journal article supplement (PMC5663699; doi:10.1038/s41467-017-01422-6), 2017-10-31
Supplement: 41467_2017_1422_MOESM3_ESM.pdf [file 41467_2017_1422_MOESM3_ESM.pdf]

## **Description of Additional Supplementary Files**

File Name: Supplementary Data 1

Description: Sample information for the genetically unrelated individuals.

File Name: Supplementary Data 2

Description: Relative and absolute proteomic quantification by SWATH-MS.

File Name: Supplementary Data 3

Description: T21 associated RNA, protein, and protein degradation regulations.

File Name: Supplementary Data 4

Description: The Reactome processes significantly regulated due to T21 in twin samples and unrelated samples.

File Name: Supplementary Data 5

Description: Significant, overlapping biological processes after GESA analysis at mRNA, protein, and Kdeg levels.

File Name: Supplementary Data 6

Description: Enrichment analysis of GO biological processes for all the five segments evenly divided based on the T1DS/T2N fold-change of protein degradation.

File Name: Supplementary Data 7

Description: Enrichment analysis of GO cellular component for all the five segments evenly divided based on the T1DS/T2N fold-change of protein degradation.
